# Supplementary material
Source: PubMed Central journal article supplement (PMC7407536)

## ***Supporting Information***

### **A Biological Safe Gold Nanoparticle-Modified Dental Aligner Prevents the *Porphyromonas gingivalis* Biofilm Formation**

#### ***Authors:***

**Mengqi Zhang<sup>a,†</sup>, Xiaomo Liu<sup>a,†</sup>, Yangzhouyun Xie<sup>b,†</sup>, Qian Zhang<sup>c,\*</sup>, Wei Zhang<sup>b,\*</sup>, Xingyu Jiang<sup>b,d,\*</sup>, and Jiuxiang Lin<sup>a,\*</sup>**

#### ***Affiliations:***

<sup>a</sup>Department of Orthodontics, Peking University School and Hospital of Stomatology, No.22, Zhongguancun South Avenue, Haidian District, Beijing, 100081, P.R. China

<sup>b</sup>Beijing Engineering Research Center for BioNanotechnology and CAS Key Laboratory for Biomedical Effects of Nanomaterials and Nanosafety, CAS Center for Excellence in Nanoscience, National Center for NanoScience and Technology, No. 11 Zhongguancun Beiyitiao, Beijing 100190, P. R. China

<sup>c</sup>Central laboratory, Peking University School and Hospital of Stomatology, No.22, Zhongguancun South Avenue, Haidian District, Beijing, 100081, P.R. China

<sup>d</sup>Department of Biomedical Engineering, Southern University of Science and Technology, No. 1088 Xueyuan Rd, Nanshan District, Shenzhen, Guangdong, 518055, P. R. China

<sup>†</sup>M. Zhang, X. Liu and Y. Xie contributed equally to this work.

#### ***Contents:***

- 1) Grading system for oral reactions S2-S3**
- 2) Bacterial suspension with untreated and AuDAPT-coated samples S3**

## SUPPLEMENTARY INFORMATION

Table S1. Grading system for oral reactions

| Reaction                            | Numerical grading |
|-------------------------------------|-------------------|
| Erythema and eschar formation       |                   |
| No erythema                         | 0                 |
| Very slight erythema                | 1                 |
| Well-defined erythema               | 2                 |
| Moderate erythema                   | 3                 |
| Severe erythema to eschar formation | 4                 |

Table S2. Grading system for microscopic examination for oral tissue reaction

| Reaction                      | Numerical grading |
|-------------------------------|-------------------|
| 1. epithelium                 |                   |
| Normal, intact                | 0                 |
| Cell degeneration or flatting | 1                 |
| Metaplasia                    | 2                 |
| Focal erosion                 | 3                 |
| Generalized erosion           | 4                 |
| 2. Leucocyte infiltration     |                   |
| Absent                        | 0                 |
| Minimal (less than 25)        | 1                 |
| Mild (26 to 50)               | 2                 |
| Moderate (51 to 100)          | 3                 |
| Marked (greater than 100)     | 4                 |
| 3. Vascular congestion        |                   |
| Absent                        | 0                 |
| Minimal                       | 1                 |

|                                    |   |
|------------------------------------|---|
| Mild                               | 2 |
| Moderate                           | 3 |
| Marked, with disruption of vessels | 4 |
| 4. Edema                           |   |
| Absent                             | 0 |
| Minimal                            | 1 |
| Mild                               | 2 |
| Moderate                           | 3 |
| Marked                             | 4 |

---

Figure S1. Bacterial suspension with untreated and AuDAPT-coated samples (cultured for 48h) and spirally inoculation colonies.

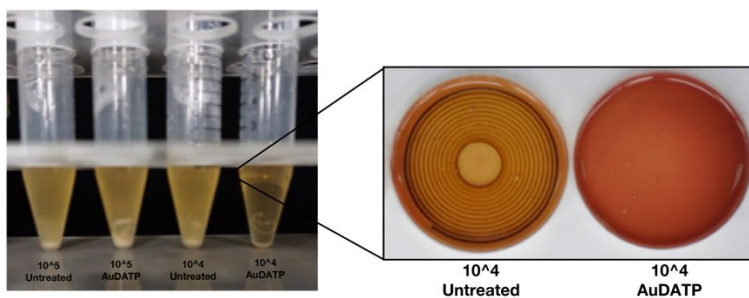

Supplement: ao0c01532_si_001.pdf [file ao0c01532_si_001.pdf]
